# Supplementary material for: Hydroxytyrosol, the Major Phenolic Compound of Olive Oil, as an Acute Therapeutic Strategy after Ischemic Stroke
Source: PubMed Central journal article supplement (PMC6836045; doi:10.3390/nu11102430), 2019-10-11
Supplement: nutrients-11-02430-s001.pdf [file nutrients-11-02430-s001.pdf]

**Table S1.** Excluded mice per experiment.

| Test                                  | Sham-Control | Sham-HT | Stroke-Control | Stroke-HT |
|---------------------------------------|--------------|---------|----------------|-----------|
| Open Field                            | 0            | 0       | 0              | 0         |
| Grip test                             | 0            | 0       | 0              | 0         |
| Pole test                             | 0            | 0       | 2              | 1         |
| Rotarod                               | 0            | 0       | 1              | 0         |
| Prepulse inhibition                   | 0            | 1       | 1              | 0         |
| Morris water maze                     | 0            | 0       | 0              | 0         |
| Novel object recognition test         | 0            | 0       | 0              | 0         |
| Digital ventilated cages              | 0            | 0       | 0              | 0         |
| MRI—Arterial spin labelling           | 0            | 1       | 1              | 1         |
| MRI—Diffusion tensor imaging          | 0            | 1       | 1              | 0         |
| Resting state functional MRI          | 1            | 1       | 2              | 1         |
| qPCR—PSD95 & GLUT-1                   | 0            | 0       | 1              | 1         |
| qPCR—BDNF                             | 0            | 1       | 1              | 1         |
| Immunohistochemistry—DCX              | 0            | 0       | 1              | 0         |
| Immunohistochemistry—IBA-1 (0.62)     | 0            | 2       | 1              | 0         |
| Immunohistochemistry—IBA-1 (-1.94)    | 1            | 1       | 0              | 1         |
| Immunohistochemistry - GLUT-1 (0.62)  | 0            | 1       | 2              | 0         |
| Immunohistochemistry - GLUT-1 (-1.94) | 0            | 0       | 2              | 0         |
| Serum NO                              | 0            | 0       | 1              | 0         |
| Serum Oxidative Stress Level          | 0            | 0       | 0              | 0         |

**Table S2.** Sequence of the PCR primers used in this study. (Used abbreviations: Bdnf, brain derived neurotrophic factor; GLUT-1, glucose transporter 1; Psd-95, postsynaptic density protein 95; HPRT, hypoxanthine guanine phosphoribosyl transferase; B2M, beta-2 microglobulin).

| Gene  | Direction | Sequence (5' to 3')     |
|-------|-----------|-------------------------|
| BDNF  | Forward   | CTTCCTGCATCTGTTGGGGA    |
|       | Reverse   | TGGTGGAAACATTGTGGCTTTG  |
| GLUT1 | Forward   | GATCCCAGCAGCAAGAAGGT    |
|       | Reverse   | TAGCCGAACTGCAGTGATCC    |
| PSD95 | Forward   | TGGATCACAGGGTCGAGAAGA   |
|       | Reverse   | TTGGCACGGTCTTTGGTAGG    |
| HPRT  | Forward   | TGATTAGCGATGATGAACCAGGT |
|       | Reverse   | AGCAAGTCTTTCAGTCCTGTCC  |
| B2M   | Forward   | GATGTCAGATATGTCCTTCAGCA |
|       | Reverse   | TCACATGTCTCGATCCCAGT    |

**Angle:**

$$\alpha = \arccos \frac{|X_n - X_{n-1}|}{DM_n}$$

where  $X$  is  $x$  position and  $DM$  is direction of motion.

**Relative Turn Angle:** Change in heading between two consecutive samples

$$RTA_n = HE_n - HE_{n-1}$$

**Relative Angular Velocity (synonym, Turn Bias):** Change in relative turn angle over time delta

$$RAV_n = \frac{RTA_n}{t_n - t_{n-1}}$$

**Laterality Index:** Tendency to turn right vs left

$$LI = \frac{\|RTA_R\|}{\|RTA_R\| + \|RTA_L\|}$$

where  $RTA_R$  is a right turn angle  $\in [30, 90]$ ,  $RTA_L$  is a left turn angle  $\in [-30, -90]$ , and  $LI \in [0, 1]$ .

**Figure S1.** A detailed explanation of the calculations on the aforementioned DVC (Digital Ventilated Cages) metric measures.

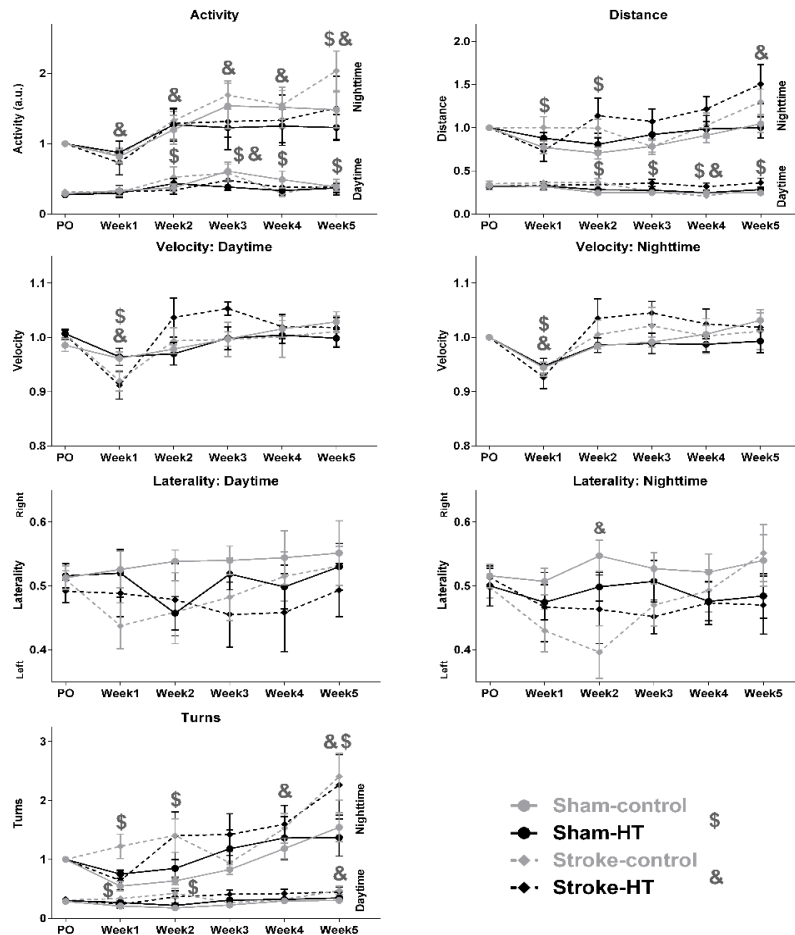

**Figure S2.** Individual locomotion via digital ventilated cage (DVC) metrics measures. (A) activity, (B) walked distance, (C,D) walked velocity, (E) total turns and (F,G) laterality index, during day- and nighttime before and after surgery. No diet effects were found on DVC metrics. Notably, several stroke effects were found: i.e., During nighttime, only stroke mice were less active after surgery over time ( $p < 0.026$ ) comparing presurgery with postsurgery week 1. Only during nighttime, stroke mice ( $p < 0.028$ ) showed a left turning preference (laterality) comparing presurgery with postsurgery week 2.
